# Supplementary material for: Positive Selection Driving Cytoplasmic Genome Evolution of the Medicinally Important Ginseng Plant Genus Panax
Source: Front Plant Sci. 2018 Apr 4;9:359. doi: 10.3389/fpls.2018.00359 (PMC5893753; doi:10.3389/fpls.2018.00359)
Supplement: Table S2 — Numbers of synonymous and non-synonymous sites for each gene of the chloroplast genome in Panax. [file Table2.XLSX]

## Sheet: Sheet1
Table S2. Numbers of synonymous and non-synonymous sites for each gene of the chloroplast genome in Panax.
Category of genes	Group of genes	Name of genes	All species		Panax ginseng		Panax quinquefolius		Panax japonicus		Panax bipinnatifudus var. major 1		Panax bipinnatifudus var. major 2		Panax bipinnatifudus var. major 3		Panax bipinnatifudus var. japonicus		Panax bipinnatifudus var. zingiberensis		Panax notoginseng		Panax stipuleanatus		Panax trifolius
			syn	nonsyn	syn	nonsyn	syn	nonsyn	syn	nonsyn	syn	nonsyn	syn	nonsyn	syn	nonsyn	syn	nonsyn	syn	nonsyn	syn	nonsyn	syn	nonsyn	syn	nonsyn
Self-replication	Small subunit of ribosome	rps2	6	2	0	0	0	0	0	0	0	1	0	1	0	1	0	1	0	1	2	1	3	0	4	0
		rps4	5	3	0	0	0	0	0	0	2	0	2	0	2	0	2	0	2	0	3	0	2	2	1	1
		rps11	2	1	0	0	0	0	0	0	0	1	0	1	0	1	0	1	0	1	0	1	0	1	2	1
		rps12	0	1	0	0	0	0	0	0	0	0	0	0	0	0	0	0	0	0	0	0	0	0	0	1
		rps14	1	1	0	0	0	0	0	1	0	0	0	0	0	0	0	0	0	0	0	0	1	0	0	0
		rps15	1	4	0	0	0	1	1	1	0	2	0	1	0	1	0	1	0	1	0	1	0	2	0	3
		rps16	2	0	0	0	0	0	0	0	0	0	0	0	0	0	1	0	0	0	0	0	0	0	1	0
		rps18	1	0	0	0	0	0	0	0	0	0	0	0	0	0	0	0	0	0	0	0	1	0	0	0
	Large subunit of ribosome	rp12	0	2	0	0	0	0	0	0	0	1	0	1	0	1	0	1	0	1	0	0	0	0	0	1
		rpl20	2	2	0	0	1	0	1	0	1	0	1	0	1	0	1	0	1	0	1	0	2	0	2	2
		rpl22	1	1	0	0	0	0	0	0	0	0	0	0	0	0	0	0	0	0	1	0	0	0	0	1
		rpl32	3	0	0	0	0	0	0	0	0	0	0	0	0	0	1	0	0	0	0	0	0	0	2	0
		rpl33	0	1	0	0	0	0	0	0	0	0	0	0	0	0	0	0	0	0	0	0	0	1	0	0
		rpl36	2	0	0	0	0	0	1	0	0	0	0	0	0	0	0	0	0	0	0	0	0	0	1	0
	DNA dependent RNA polymerase	rpoB	23	9	0	0	0	0	0	0	3	0	3	0	3	0	3	1	2	1	4	0	10	5	14	4
		rpoC1	28	12	1	0	2	0	1	0	5	2	5	2	5	2	5	3	3	4	5	2	10	3	16	4
		rpoC2	33	31	0	0	1	1	0	0	7	3	7	3	7	3	5	6	7	7	5	4	14	15	19	14
Genes for photosynthesis	Subunits of NADH-dehydrogenase	ndhA	6	9	0	0	0	1	0	0	0	0	0	0	0	0	0	1	0	0	0	1	1	4	6	4
		ndhC	4	1	0	0	1	0	1	0	2	0	2	0	2	0	2	0	3	0	2	0	2	0	3	1
		ndhD	18	12	0	0	0	0	0	0	5	2	5	2	5	2	4	2	6	3	1	1	1	3	10	5
		ndhE	5	2	0	0	0	0	0	0	2	1	2	1	2	1	1	0	2	0	2	0	1	1	2	1
		ndhF	24	27	0	0	0	0	0	1	2	2	2	2	2	2	2	3	3	2	3	2	13	15	15	9
		ndhG	5	4	0	0	0	0	1	0	0	2	0	2	0	2	0	2	0	2	0	2	2	3	2	3
		ndhH	21	5	0	0	0	0	0	0	4	0	4	0	4	0	3	0	1	0	3	0	7	3	13	5
		ndhI	6	1	0	0	0	0	2	0	1	0	1	0	1	0	1	0	1	0	2	0	2	1	3	0
		ndhJ	5	1	0	0	0	0	0	0	1	0	1	0	1	0	1	0	1	0	1	0	1	0	2	1
		ndhK	9	2	0	0	2	0	2	1	1	0	1	0	1	0	1	0	1	0	2	0	3	1	6	0
	Subunits of photosystem I	psaA	12	2	0	0	1	1	1	0	4	0	5	0	4	0	4	0	5	0	3	0	5	1	4	0
		psaB	13	6	0	0	1	4	0	0	1	0	1	0	1	0	1	0	1	1	1	0	6	0	7	1
		psaC	2	0	0	0	0	0	0	0	0	0	0	0	0	0	0	0	0	0	0	0	1	0	2	0
		psaI	1	0	0	0	0	0	1	0	1	0	1	0	1	0	1	0	1	0	1	0	1	0	1	0
		ycf3	3	0	0	0	0	0	0	0	1	0	1	0	1	0	1	0	1	0	0	0	0	0	2	0
	Subunits of photosystem II	psbB	17	1	0	0	1	0	0	0	1	0	1	0	1	0	4	0	1	0	1	0	7	0	6	1
		psbC	9	2	0	0	1	0	0	0	1	0	1	0	1	0	1	0	3	0	0	1	4	2	4	0
		psbE	1	0	0	0	0	0	0	0	0	0	0	0	0	0	0	0	0	0	0	0	1	0	0	0
		psbH	1	0	0	0	0	0	0	0	0	0	0	0	0	0	0	0	0	0	0	0	1	0	0	0
		psbI	1	0	0	0	0	0	0	0	0	0	0	0	0	0	0	0	0	0	0	0	0	0	1	0
		psbJ	1	0	0	0	0	0	0	0	0	0	0	0	0	0	0	0	0	0	1	0	0	0	0	0
		psbK	0	1	0	0	0	0	0	0	0	0	0	0	0	0	0	0	0	0	0	0	0	0	0	1
		psbM	2	0	0	0	0	0	0	0	0	0	0	0	0	0	0	0	0	0	1	0	0	0	1	0
		psbT	1	0	0	0	1	0	0	0	0	0	0	0	0	0	0	0	0	0	0	0	0	0	0	0
	Subunits of cytochrome b/f complex	petA	8	2	0	0	0	0	0	0	1	1	1	1	1	1	1	0	2	0	0	1	4	0	3	0
		petB	4	0	0	0	0	0	0	0	0	0	0	0	0	0	0	0	0	0	0	0	1	0	3	0
		petG	1	0	0	0	0	0	0	0	0	0	0	0	0	0	0	0	0	0	0	0	1	0	0	0
		petL	2	3	0	0	0	0	0	0	1	0	1	0	1	0	1	2	1	0	0	0	0	1	1	1
		atpA	16	2	0	0	0	0	0	0	2	0	2	0	2	0	2	0	1	0	1	0	6	0	9	2
		atpB	0	2	0	0	0	0	0	0	0	0	0	0	0	0	0	0	0	0	0	2	0	0	0	0
		atpF	4	4	0	0	1	0	0	1	1	1	1	1	1	1	1	2	0	1	1	1	0	1	1	2
		atpH	0	1	0	0	0	0	0	0	0	1	0	1	0	1	0	1	0	0	0	0	0	0	0	0
		atpI	6	1	0	0	0	0	1	0	1	0	1	0	1	0	0	0	1	0	0	0	3	1	1	0
	Large subunit of rubisco	rbcL	14	13	0	0	0	0	1	0	4	3	4	3	4	3	4	2	2	4	3	3	8	9	8	6
Other genes	Translational initiation factor	infA	3	1	0	0	0	0	0	0	0	0	0	0	0	0	0	0	0	0	0	0	1	0	3	1
	Maturase	matK	1	1	0	0	0	0	0	0	0	0	0	0	0	0	0	0	0	0	0	0	1	1	0	0
	Protease	clpP	3	8	0	0	0	0	1	0	0	0	0	0	0	0	0	0	0	1	0	0	0	4	2	7
	Envelope membrane protein	cemA	3	7	0	0	0	0	1	0	0	1	0	1	0	1	0	1	0	0	0	1	1	1	2	5
	Subunit of Acetyl-CoA-carboxylase	accD	7	17	0	0	1	0	0	0	0	4	0	4	0	4	0	4	0	5	1	6	0	8	5	7
	c-type cytochrome synthesis gene	ccsA	9	9	0	0	0	0	0	0	4	0	4	0	4	0	4	1	4	0	4	0	7	7	5	4
Genes of unknown function	Open Reading Frames(ORF, ycf)	ycf1	63	218	0	0	2	2	4	9	10	30	10	30	10	30	14	37	14	38	13	32	25	92	28	102
		ycf2	0	3	0	0	0	0	0	0	0	0	0	0	0	0	0	0	0	0	0	0	0	1	0	2
		ycf2	0	1	0	0	0	0	0	0	0	0	0	0	0	0	0	0	0	0	0	0	0	1	0	0
		ycf4	10	2	0	0	1	0	1	0	1	0	1	0	1	0	1	0	2	0	1	0	5	1	5	2
		1hbA	1	0	0	0	1	0	1	0	1	0	1	0	1	0	1	0	1	0	1	0	1	0	1	0
		Total	432	441	1	0	18	10	22	14	71	58	72	57	71	57	74	72	73	73	70	62	166	191	229	205
